# Supplementary material for: Nanoscale palladium as a new benchmark electrocatalyst for water oxidation at low overpotential
Source: Royal Society of Chemistry journal article supplement (doi:10.1039/c9ta01198f), 2019-01-01
Supplement: c9ta01198f1.pdf [file c9ta01198f1.pdf]

## Supporting Information

Khurram Saleem Joya,<sup>\*a</sup> Muhammad Ali Ehsan,<sup>\*b</sup> Noor-Ul-Ain Baber,<sup>c</sup> Manzar  
Sohail<sup>d</sup> and Zain H. Yamani<sup>b</sup>

<sup>a</sup> *Department of Chemistry, King Fahd University of Petroleum and Minerals (KFUPM), Dhahran, 31261, Saudi Arabia.*

<sup>b</sup> *Center of Research Excellence in Nanotechnology (CENT), King Fahd University of Petroleum and Minerals, Dhahran, 31261, Saudi Arabia.*

<sup>c</sup> *Department of Chemistry, University of Engineering and Technology, G.T Road, Lahore, Punjab 54890, Pakistan*

<sup>d</sup> *Leibniz-Institut für Katalyse e.V. an der Universität Rostock (LIKAT), Albert-Einstein-Str. 29a, 18059 Rostock, Germany*

## **CHEMICALS AND REAGENTS:**

All the chemicals and reagents were of analytical grade, obtained from Aldrich and were used as received without any purification step otherwise noted. Palladium acetylacetonate  $\text{Pd}(\text{acac})_2$  (99.9%) was obtained from Sigma Aldrich, Toluene (99.99%) from Sigma Aldrich, KOH (99.99%) from Sigma Aldrich. FTO coated glass substrates are obtained from Dyesol with a resistance value of approximately  $15 \Omega/\text{sq}$ .

**Table S1.** Summary of electrocatalytic activity for Pd-derived thin film electrocatalysts.

| Catalyst                | $\eta@10 \text{ mA cm}^{-2}$<br>[mV]<br>at $\eta=0.35 \text{ V}$ | Tafel<br>slope<br>[mV<br>decade <sup>-1</sup> ] | Mass<br>Activity<br>[mA mg <sup>-1</sup> ] | ECSA [cm <sup>2</sup> ] | TOF (s <sup>-1</sup> )<br>at $\eta=0.35 \text{ V}$ |
|-------------------------|------------------------------------------------------------------|-------------------------------------------------|--------------------------------------------|-------------------------|----------------------------------------------------|
| <b>Pd<sub>40</sub></b>  | 340                                                              | 44                                              | 207                                        | 4.3                     | 0.05                                               |
| <b>Pd<sub>60</sub></b>  | 330                                                              | 61                                              | 258                                        | 4.8                     | 0.07                                               |
| <b>Pd<sub>90</sub></b>  | 310                                                              | 86                                              | 292                                        | 7.2                     | 0.08                                               |
| <b>Pd<sub>120</sub></b> | 270                                                              | 67                                              | 392                                        | 8                       | 0.1                                                |
| <b>Pd<sub>180</sub></b> | <b>240</b>                                                       | <b>40</b>                                       | <b>560</b>                                 | <b>20</b>               | <b>0.2</b>                                         |

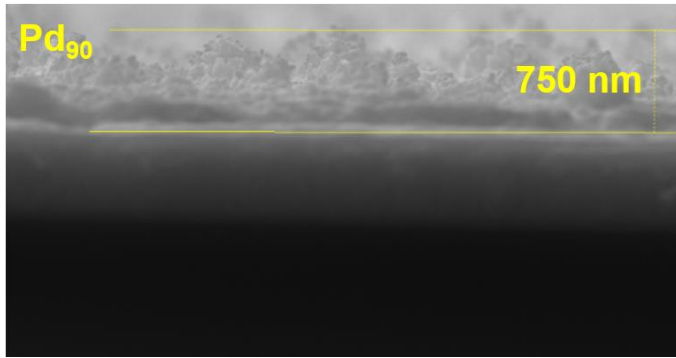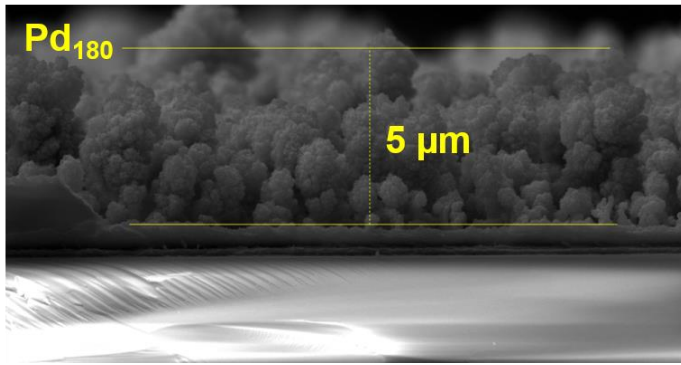

**Figure S1.** Cross-sectional scanning electron microscopy (SEM) images for Pd<sub>90</sub> and Pd<sub>180</sub> samples deposited on FTO via Aerosol-Assisted Chemical Vapor Deposition (AACVD) method.

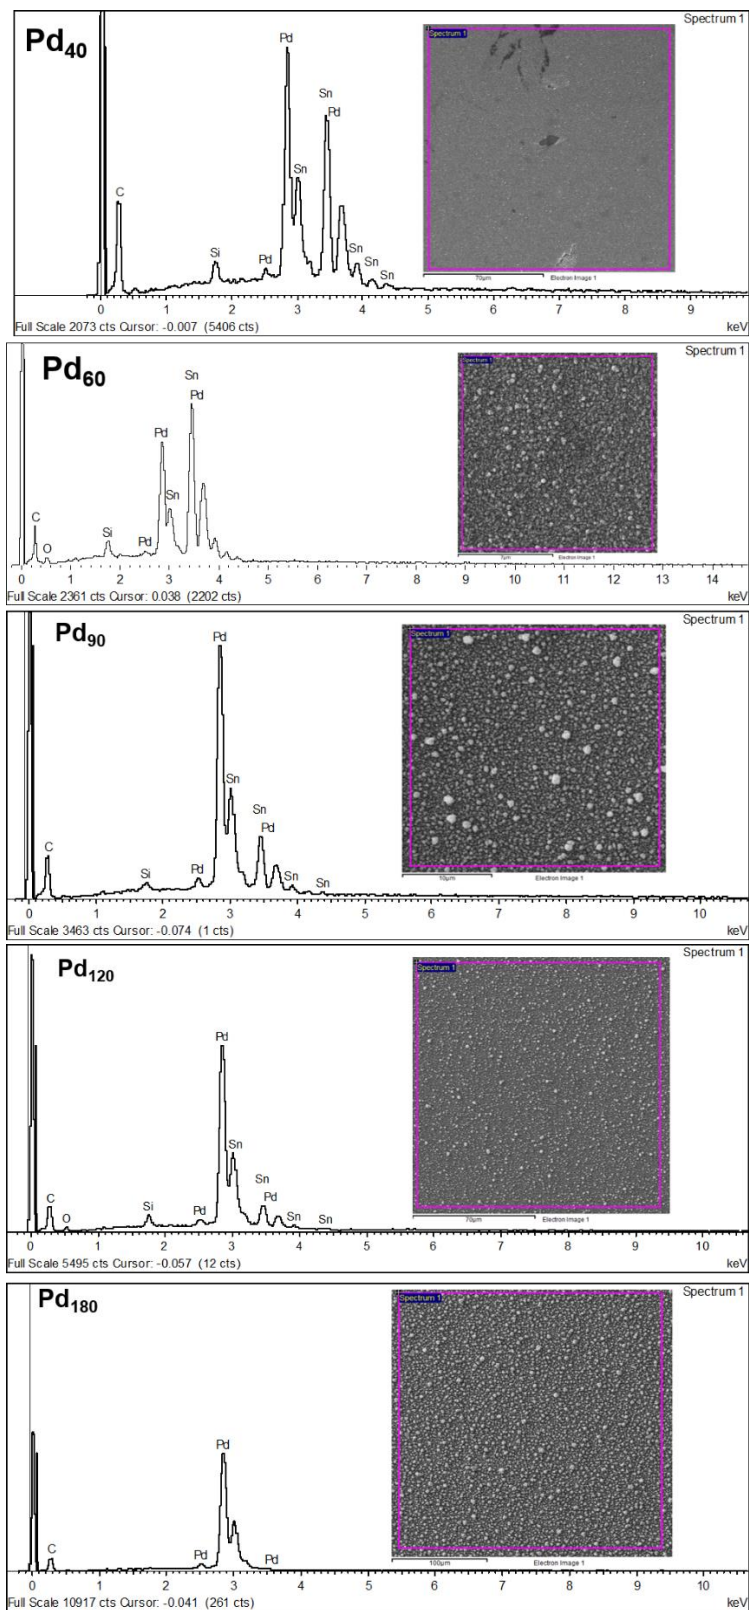

**Figure S2:** EDX spectra of Pd<sub>40</sub> Pd<sub>60</sub>, Pd<sub>90</sub>, Pd<sub>120</sub> and Pd<sub>180</sub> films deposited on FTO substrate via Aerosol-Assisted Chemical Vapor Deposition (AACVD) method.

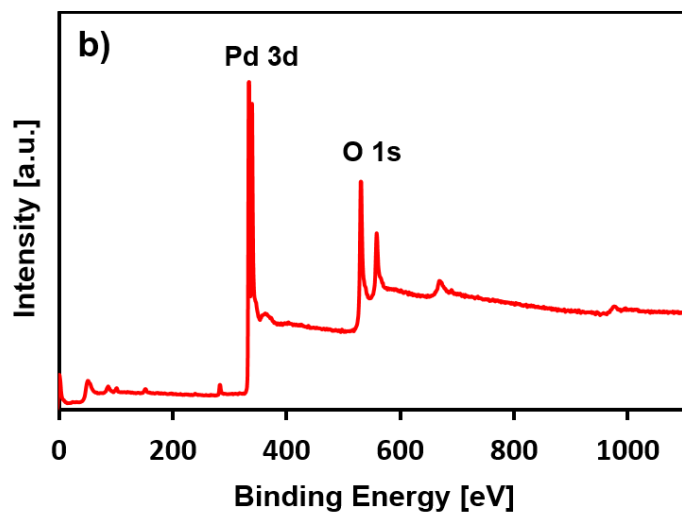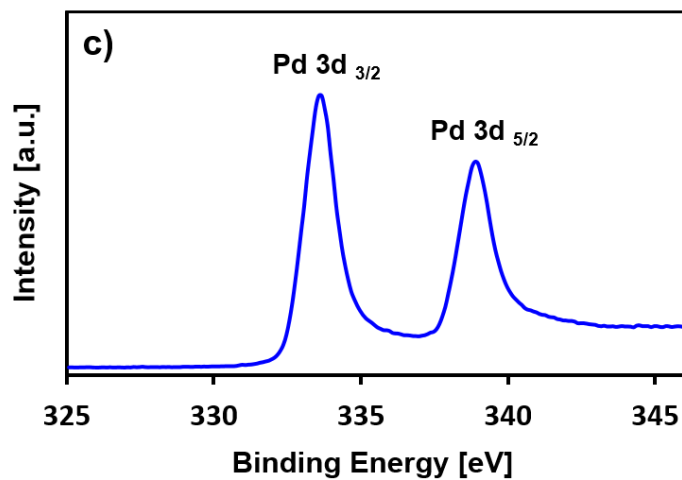

**Figure S3.** (a) XPS survey patterns of palladium film electrodes; (b) High resolution XPS study of Pd<sub>180</sub> electrode showing binding energies for the Pd(0) state.

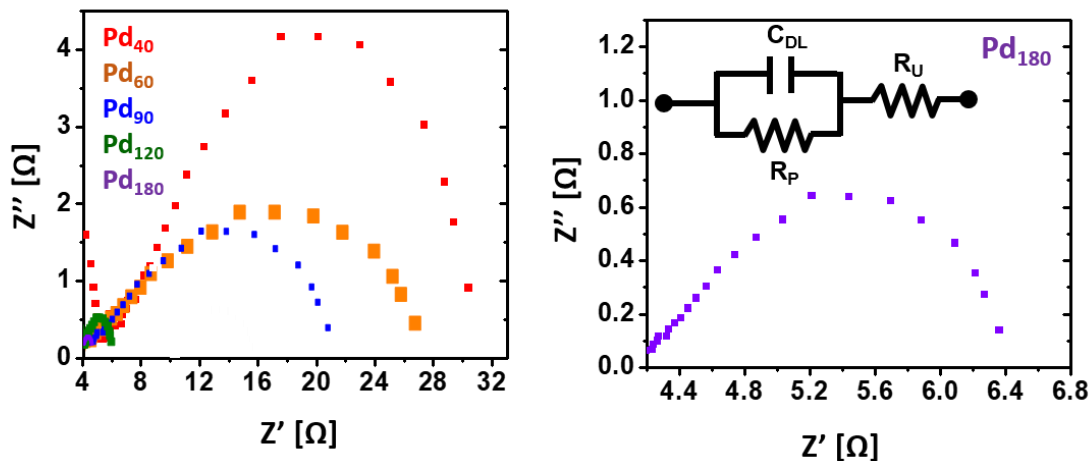

**Figure S4.** (left) Nyquist plot for Pd<sub>40</sub>, Pd<sub>60</sub>, Pd<sub>90</sub>, Pd<sub>120</sub>, and for Pd<sub>180</sub> at an applied potential of 1.48 V vs. RHE in the frequency range of 0.1 Hz to 100 KHz. (right) Enlarged view of the Nyquist plot for Pd<sub>180</sub>. For each EIS analysis, data was fitted employing Randles circuit with Nova software (inset figure). Charge transfer resistance for Pd<sub>40</sub> ≈ 15 Ω, Pd<sub>60</sub> ≈ 13 Ω, Pd<sub>90</sub> ≈ 11 Ω, Pd<sub>120</sub> ≈ 6 Ω, and Pd<sub>180</sub> ≈ 2.1 Ω is estimated by fitting a simplified Randles circuit.

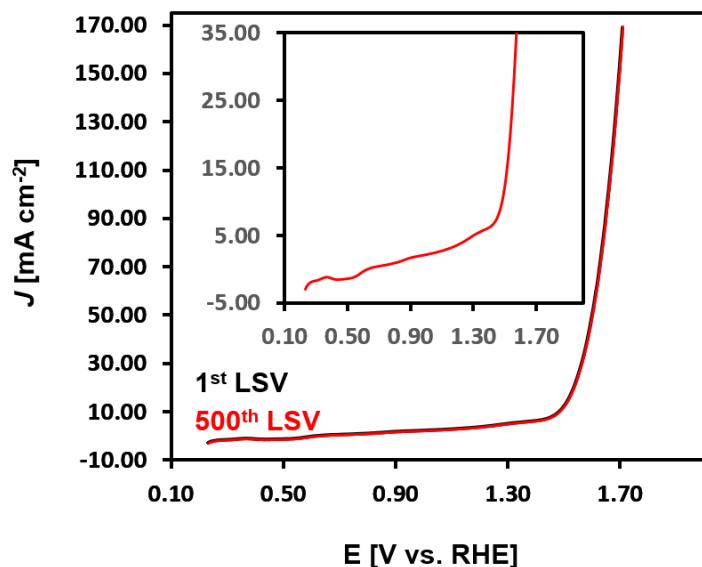

**Figure S5.** Forward potential sweeps during 1<sup>st</sup> (black line) and 500<sup>th</sup> (Red line) LSV run for Pd<sub>180</sub> electrocatalytic material in 0.1 M KOH electrolyte solution at the scan rate of 10 mV s<sup>-1</sup>. (Inset shows enlarged view of the LSV in 0.1 M KOH electrolyte solution)

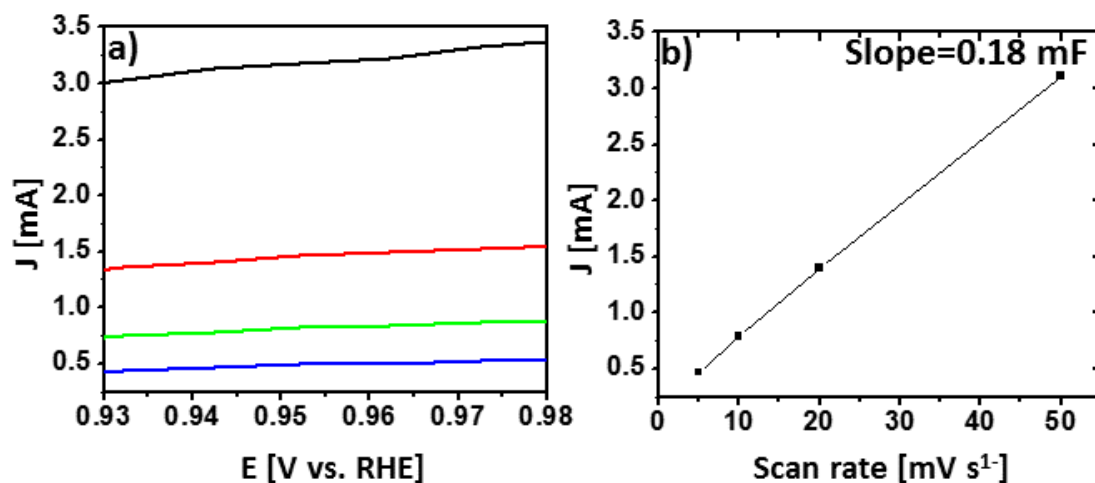

**Figure S6.** Double layer capacitance measurements for evaluating the electrochemically active surface area for Pd<sub>40</sub> type electrocatalytic system in 0.1 M KOH electrolyte solution. (a) cyclic voltammogram for Pd<sub>40</sub> measured at varying scan rate such as (blue) 5  $\text{mV s}^{-1}$  (green) 10  $\text{mV s}^{-1}$  (red) 20  $\text{mV s}^{-1}$  (black) 50  $\text{mV s}^{-1}$  in the non-faradaic region, where all the current is supposed to be due to capacitive charging (b) charging current at the fixed potential of 0.955 V vs. RHE is plotted as a function of scan rate while slope giving the value of  $C_{dl}$ . Electrochemically active surface area is found to be 4.3  $\text{cm}^2$ .

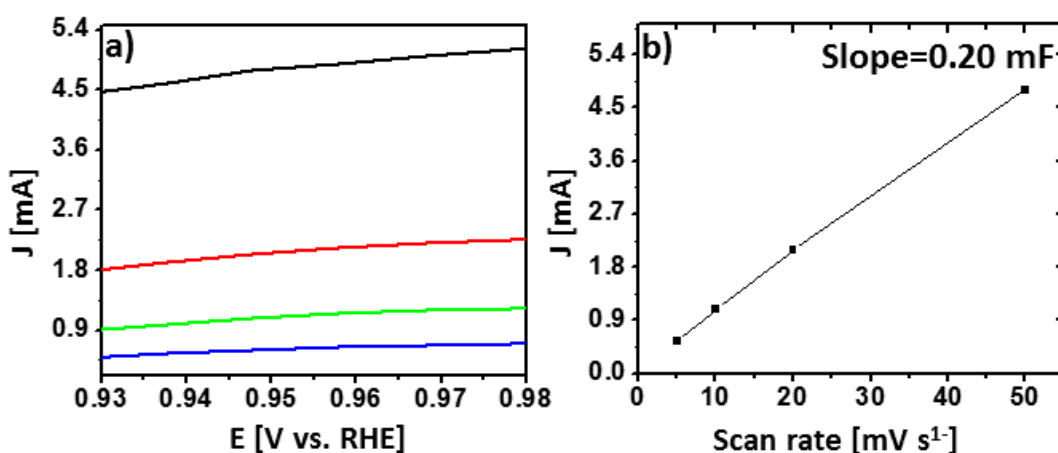

**Figure S7.** Double layer capacitance measurements for evaluating electrochemically active surface area for Pd<sub>60</sub> type electrocatalytic system in 0.1 M KOH electrolyte solution. (a) cyclic voltammogram for Pd<sub>60</sub> measured at varying scan rate such as (blue) 5  $\text{mV s}^{-1}$  (green) 10  $\text{mV s}^{-1}$  (red) 20  $\text{mV s}^{-1}$  (black) 50  $\text{mV s}^{-1}$  in the non-faradaic region, where all the current is supposed to be due to capacitive charging (b) charging current at the fixed potential of 0.955 V vs. RHE is plotted as a function of scan rate while slope giving the value of  $C_{dl}$ . Electrochemically active surface area is found to be 4.8  $\text{cm}^2$ .



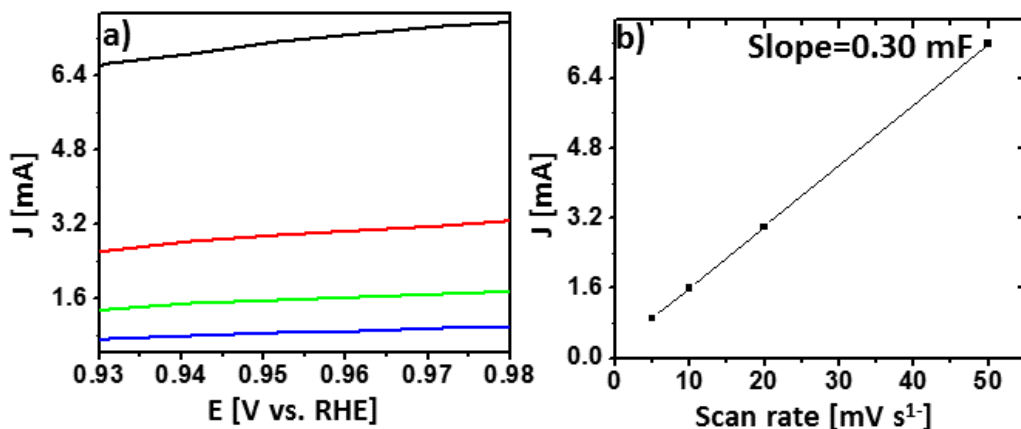

**Figure S8.** Double layer capacitance measurements for evaluating electrochemically active surface area for Pd<sub>90</sub> type electrocatalytic system in 0.1 M KOH electrolyte solution. (a) cyclic voltammogram for Pd<sub>90</sub> measured at varying scan rate such as (blue) 5  $\text{mV s}^{-1}$  (green) 10  $\text{mV s}^{-1}$  (red) 20  $\text{mV s}^{-1}$  (black) 50  $\text{mV s}^{-1}$  in the non-faradaic region, where all the current is supposed to be due to capacitive charging (b) charging current at the fixed potential of 0.955 V vs. RHE is plotted as a function of scan rate while slope giving the value of  $C_{dl}$ . Electrochemically active surface area is found to be 7.2  $\text{cm}^2$ .

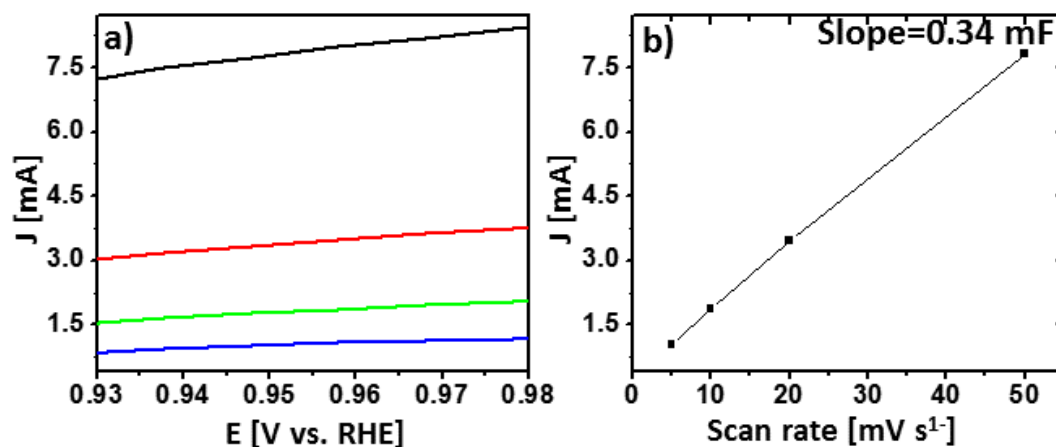

**Figure S9.** Double layer capacitance measurements for evaluating electrochemically active surface area for Pd<sub>120</sub> type electrocatalytic system in 0.1 M KOH electrolyte solution. (a) cyclic voltammogram for Pd<sub>120</sub> measured at varying scan rate such as (blue) 5  $\text{mV s}^{-1}$  (green) 10  $\text{mV s}^{-1}$  (red) 20  $\text{mV s}^{-1}$  (black) 50  $\text{mV s}^{-1}$  in the non-faradaic region, where all the current is supposed to be due to capacitive charging (b) charging current at the fixed potential of 0.955 V vs. RHE is plotted as a function of scan rate while slope giving the value of  $C_{dl}$ . Electrochemically active surface area is found to be 8  $\text{cm}^2$ .

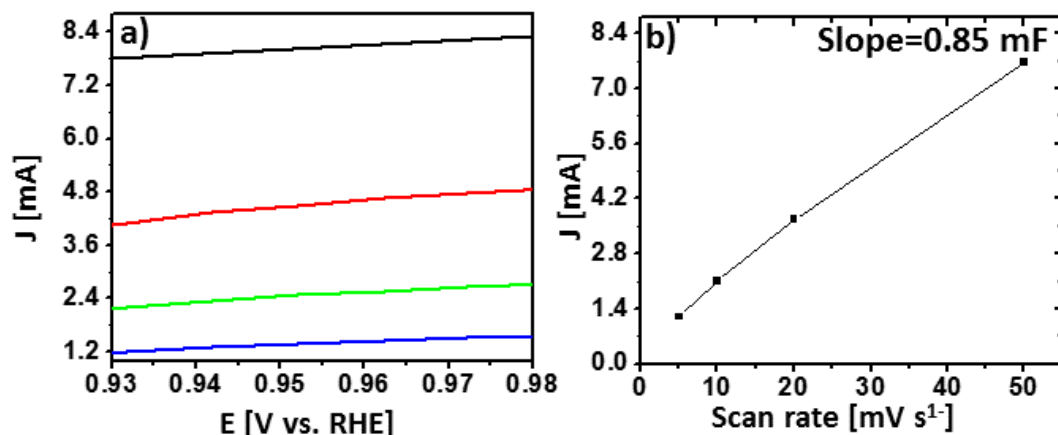

**Figure S10.** Double layer capacitance measurements for evaluating electrochemically active surface area for  $\text{Pd}_{180}$  type electrocatalytic system in 0.1 M KOH electrolyte solution. (a) cyclic voltammogram for  $\text{Pd}_{180}$  measured at varying scan rate such as (blue) 5  $\text{mV s}^{-1}$  (green) 10  $\text{mV s}^{-1}$  (red) 20  $\text{mV s}^{-1}$  (black) 50  $\text{mV s}^{-1}$  in the non-faradaic region, where all the current is supposed to be due to capacitive charging (b) charging current at the fixed potential of 0.955 V vs. RHE is plotted as a function of scan rate while slope giving the value of  $C_{dl}$ . Electrochemically active surface area is found to be 20  $\text{cm}^2$ .

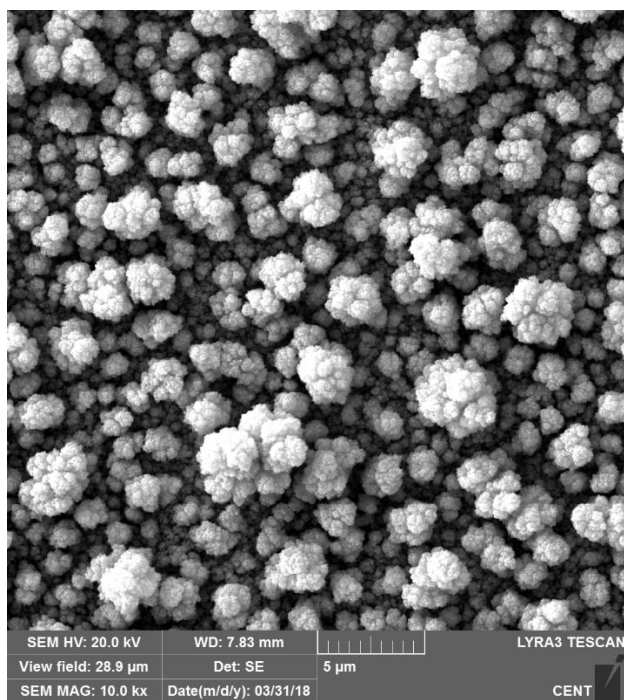

**Figure S11.** Scanning electron microscopy (SEM) images for palladium film electrode after repetitive LSVs and CCE tests.
